# Supplementary material for: Extraordinary Molecular Evolution in the PRDM9 Fertility Gene
Source: PubMed Central journal article supplement (PMC2794550; doi:10.1371/journal.pone.0008505), 2009-12-30
Supplement: pone.0008505.s003.pdf [file pone.0008505.s003.pdf]

| name       | genome position (hg18) | gene position | coding exon | ZF residue type changed | ref nt |
|------------|------------------------|---------------|-------------|-------------------------|--------|
| rs7714612  | 23545357               | 457           | 2           | NA                      | C      |
| rs62342743 | 23553783               | 8883          | 4           | NA                      | C      |
| rs10042274 | 23556970               | 12070         | 5           | NA                      | C      |
| Irie-17353 | 23562253               | 17353         | 10          | NA                      | G      |
| Irie-17918 | 23562818               | 17918         | 10          | NA                      | A      |
| rs72477009 | 23562895               | 17995         | 10          | MNC                     | G      |
| rs6875787  | 23562913               | 18013         | 10          | MNC                     | C      |
| Irie-18097 | 23562997               | 18097         | 10          | MNC                     | C      |
| rs71578786 | 23562997               | 18097         | 10          | MNC                     | C      |
| js1        | 23562997               | 18097         | 10          | MNC                     | C      |
| Irie-18109 | 23563009               | 18109         | 10          | zinc coordination       | C      |
| rs56256550 | 23563145               | 18245         | 10          | MNCA                    | C      |
| rs58979818 | 23563146               | 18246         | 10          | MNC                     | A      |
| rs56001636 | 23563166               | 18266         | 10          | MNC                     | A      |
| js2        | 23563166               | 18266         | 10          | MNC                     | A      |
| Irie-18327 | 23563227               | 18327         | 10          | MNCA                    | C      |
| Irie-18329 | 23563229               | 18329         | 10          | NA                      | C      |
| Irie-18330 | 23563230               | 18330         | 10          | MNC                     | G      |
| rs58945509 | 23563239               | 18339         | 10          | MNC                     | C      |
| rs55862350 | 23563240               | 18340         | 10          | MNC                     | A      |
| Irie-18350 | 23563250               | 18350         | 10          | MNC                     | A      |
| Irie-18413 | 23563313               | 18413         | 10          | MNCA                    | A      |
| Irie-18414 | 23563314               | 18414         | 10          | MNC                     | G      |
| Irie-18415 | 23563315               | 18415         | 10          | MNC                     | A      |
| Irie-18416 | 23563316               | 18416         | 10          | MNC                     | T      |
| Irie-18417 | 23563317               | 18417         | 10          | MNCA                    | A      |
| Irie-18423 | 23563323               | 18423         | 10          | MNC                     | A      |
| js4        | 23563323               | 18423         | 10          | MNC                     | A      |
| Irie-18424 | 23563324               | 18424         | 10          | MNC                     | A      |
| js3        | 23563358               | 18458         | 10          | finger linker           | C      |
| rs61051796 | 23563395               | 18495         | 10          | MNCA                    | A      |
| Irie-18497 | 23563397               | 18497         | 10          | MNCA                    | C      |
| Irie-18498 | 23563398               | 18498         | 10          | MNC                     | A      |
| Irie-18507 | 23563407               | 18507         | 10          | MNC                     | C      |
| Irie-18518 | 23563418               | 18518         | 10          | MNC                     | A      |
| js5        | 23563442               | 18542         | 10          | finger linker           | C      |
| Irie-18579 | 23563479               | 18579         | 10          | MNCA                    | C      |
| Irie-18635 | 23563535               | 18635         | 10          |                         | C      |

NA = not applicable

ND = not determined

MNC = major nucleotide contact

MNCA = major nucleotide contact adjacent

S = synonymous

NS = non-synonymous

genome and gene positions are 1-based

gene position is based on genome sequence, starting with the "A" of the start codon "ATG" of gene  
the population origin for "ND" entries is probably European

| allele nt | ref aa | allele aa | type | population        | ref homozygote |
|-----------|--------|-----------|------|-------------------|----------------|
| T         | D      | D         | S    | ND                | NA             |
| T         | R      | C         | NS   | ND                | NA             |
| T         | G      | G         | S    | ND                | NA             |
| T         | G      | V         | NS   | Japanese          | 344            |
| T         | S      | S         | S    | Japanese          | 364            |
| A         | R      | Q         | NS   | ND                | NA             |
| G         | T      | S         | NS   | ND                | NA             |
| G         | T      | S         | NS   | Japanese          | 36             |
| G         | T      | S         | NS   | European          | NA             |
| G         | T      | S         | NS   | Yoruban           | NA             |
| G         | T      | R         | NS   | Japanese          | 358            |
| A         | S      | R         | NS   | ND                | NA             |
| G         | N      | D         | NS   | ND                | NA             |
| T         | R      | S         | NS   | ND                | NA             |
| T         | R      | S         | NS   | European          | NA             |
| A         | R      | S         | NS   | Japanese          | 271            |
| A         | R      | R         | S    | Japanese          | 336            |
| A         | D      | N         | NS   | Japanese          | 349            |
| G         | H      | D         | NS   | ND                | NA             |
| T         | H      | L         | NS   | ND                | NA             |
| T         | R      | S         | NS   | Japanese          | 256            |
| C         | R      | S         | NS   | Japanese          | 327            |
| T         | D      | Y         | NS   | Japanese          | 330            |
| G         | D      | G         | NS   | Japanese          | 335            |
| G         | D      | E         | NS   | Japanese          | 335            |
| C         | K      | Q         | NS   | Japanese          | 333            |
| G         | N      | D         | NS   | Japanese          | 329            |
| C         | N      | H         | NS   | Yoruban, European | NA             |
| T         | N      | I         | NS   | Japanese          | 318            |
| G         | E      | D         | NS   | Yoruban           | NA             |
| C         | S      | R         | NS   | ND                | NA             |
| A         | S      | R         | NS   | Japanese          | 339            |
| G         | N      | D         | NS   | Japanese          | 339            |
| A         | H      | N         | NS   | Japanese          | 338            |
| T         | R      | S         | NS   | Japanese          | 303            |
| G         | E      | D         | NS   | Yoruban           | NA             |
| A         | R      | S         | NS   | Japanese          | 341            |
| T         | Y      | Y         | S    | Japanese          | 342            |

: model CCDS43307.1

| heterozygote | allele<br>homozygote | frequency | source     | note                     |
|--------------|----------------------|-----------|------------|--------------------------|
| NA           | NA                   |           | dbSNP130   |                          |
| NA           | NA                   | ND        | dbSNP130   |                          |
| NA           | NA                   | ND        | dbSNP130   |                          |
| 1            | 0                    | 0.0014    | Irie et al | sterile only             |
| 14           | 0                    | 0.0185    | Irie et al |                          |
| NA           | NA                   | ND        | dbSNP130   |                          |
| NA           | NA                   | ND        | dbSNP130   |                          |
| 101          | 239                  | 0.7699    | Irie et al | major allele in Japanese |
| NA           | NA                   | ND        | dbSNP130   | same as Irie-18097       |
| NA           | NA                   | ND        | Ng et al   | same as Irie-18097       |
| 1            | 0                    | 0.0014    | Irie et al | sterile only             |
| NA           | NA                   | ND        | dbSNP130   |                          |
| NA           | NA                   | ND        | dbSNP130   |                          |
| NA           | NA                   | ND        | dbSNP130   |                          |
| NA           | NA                   | ND        | Ng et al   | same as rs56001636       |
| 85           | 3                    | 0.1267    | Irie et al |                          |
| 23           | 0                    | 0.0320    | Irie et al |                          |
| 9            | 0                    | 0.0126    | Irie et al |                          |
| NA           | NA                   | ND        | dbSNP130   |                          |
| NA           | NA                   | ND        | dbSNP130   |                          |
| 98           | 3                    | 0.1457    | Irie et al |                          |
| 33           | 0                    | 0.0458    | Irie et al |                          |
| 30           | 0                    | 0.0417    | Irie et al |                          |
| 25           | 0                    | 0.0347    | Irie et al |                          |
| 25           | 0                    | 0.0347    | Irie et al |                          |
| 27           | 0                    | 0.0375    | Irie et al |                          |
| 31           | 0                    | 0.0431    | Irie et al |                          |
| NA           | NA                   | ND        | Ng et al   |                          |
| 42           | 0                    | 0.0583    | Irie et al |                          |
| NA           | NA                   | ND        | this study |                          |
| NA           | NA                   | ND        | dbSNP130   |                          |
| 21           | 0                    | 0.0292    | Irie et al |                          |
| 21           | 0                    | 0.0292    | Irie et al |                          |
| 22           | 0                    | 0.0306    | Irie et al |                          |
| 57           | 0                    | 0.0792    | Irie et al |                          |
| NA           | NA                   | ND        | Ng et al   |                          |
| 10           | 0                    | 0.0142    | Irie et al |                          |
| 8            | 0                    | 0.0114    | Irie et al |                          |
